# Supplementary material
Source: PubMed Central journal article supplement (PMC4448733)
Supplement: NIHMS658060-supplement-Supp_FigureS1-S4.pdf [file NIHMS658060-supplement-Supp_FigureS1-S4.pdf]

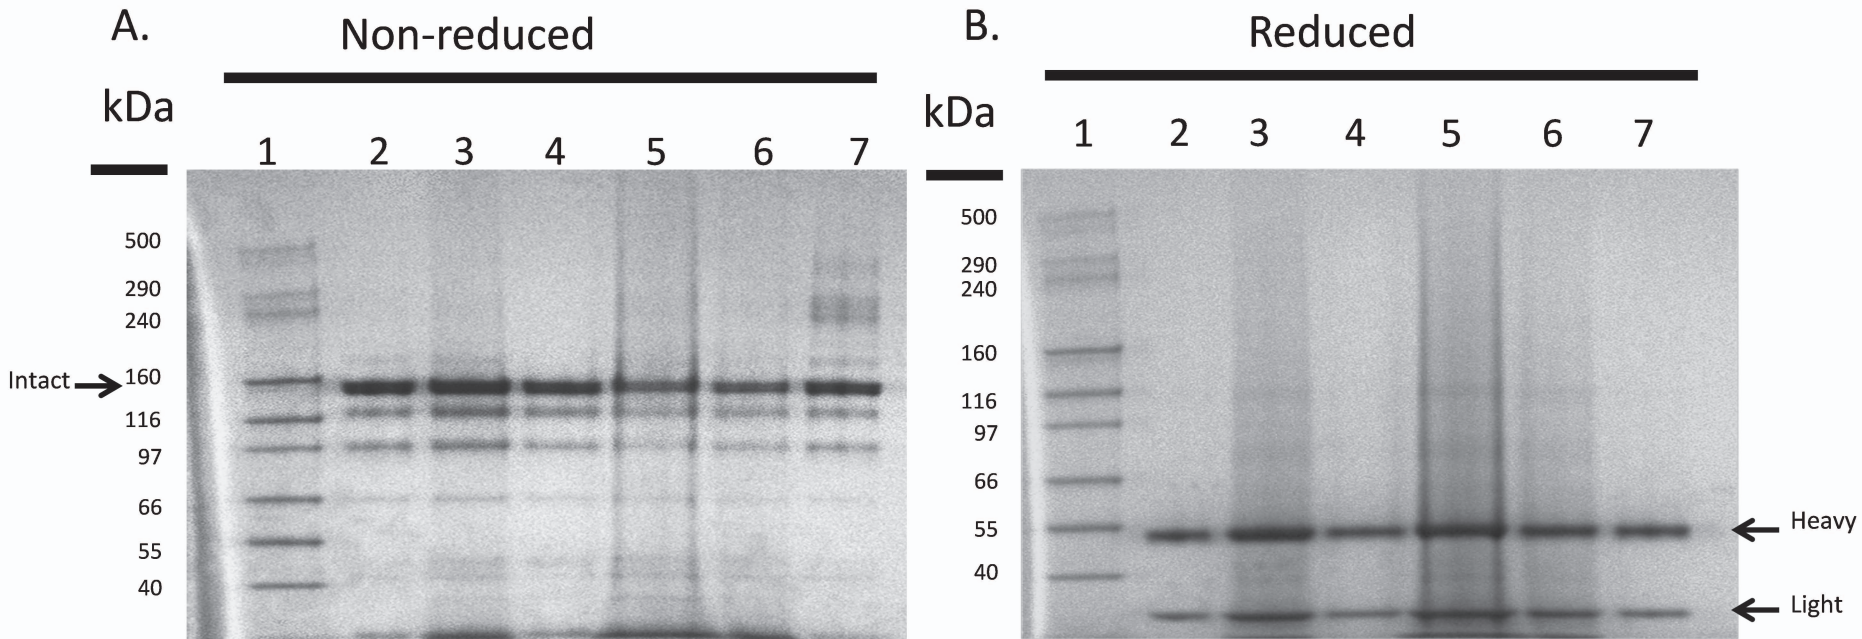

| Lane | Sample       |
|------|--------------|
| 1.   | Ladder       |
| 2.   | Control      |
| 3.   | Stir-20h     |
| 4.   | Supernatant  |
| 5.   | Pellet       |
| 6.   | Bottom       |
| 7.   | Heat Control |

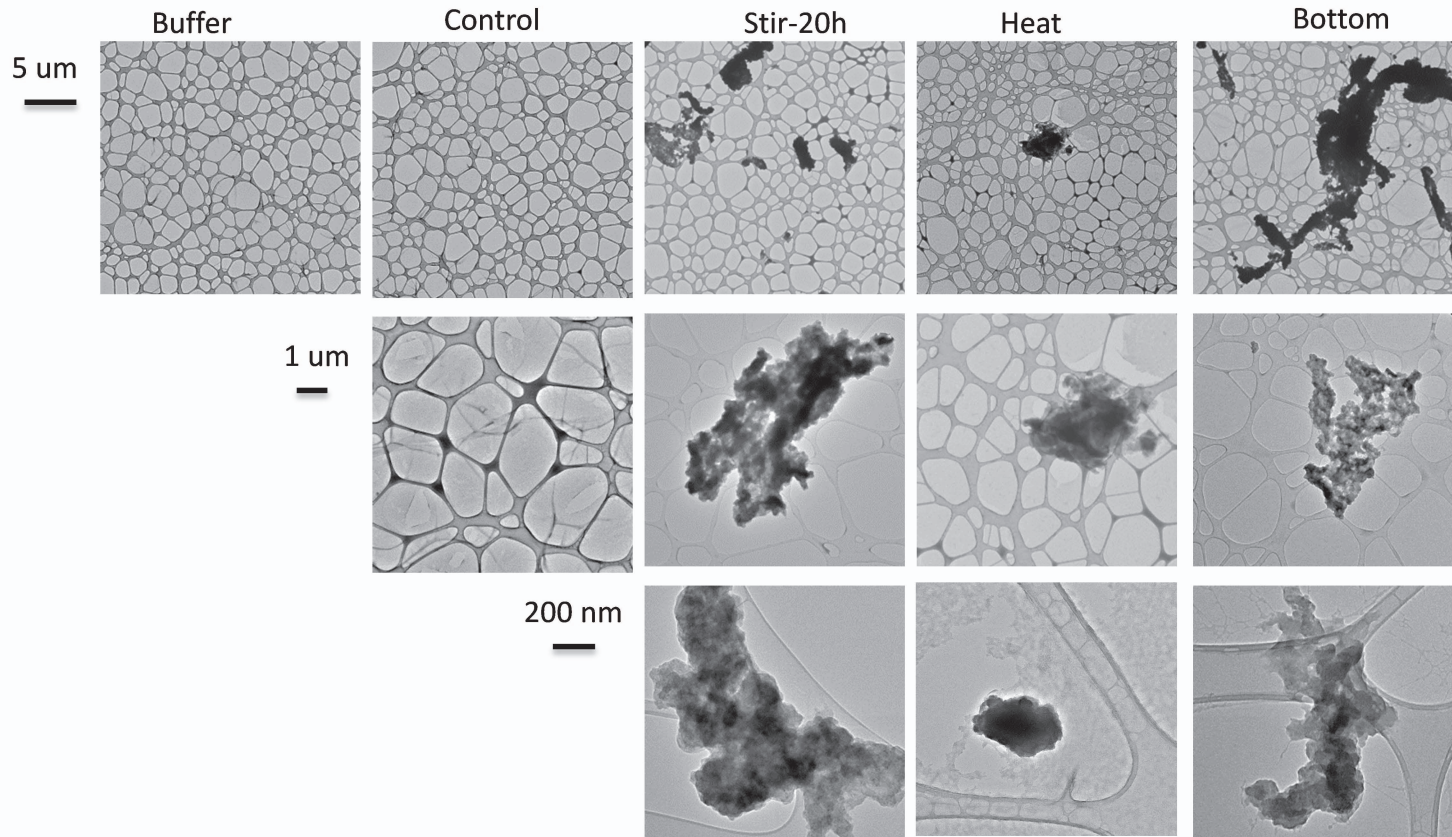

**Most Abundant Elements**  
 (background elements: Au, Al  
 Si, Cu, U from sample prep)

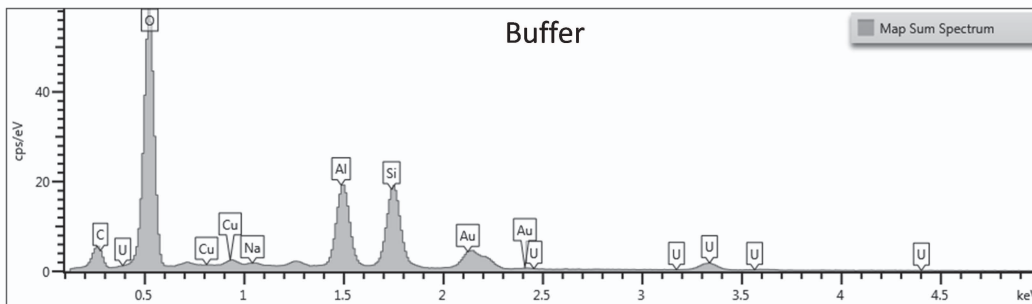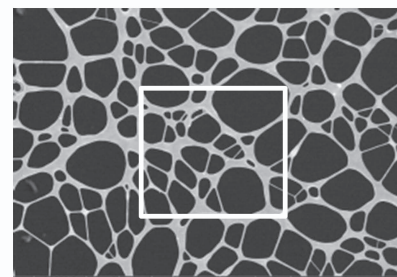

C & O (3/3)

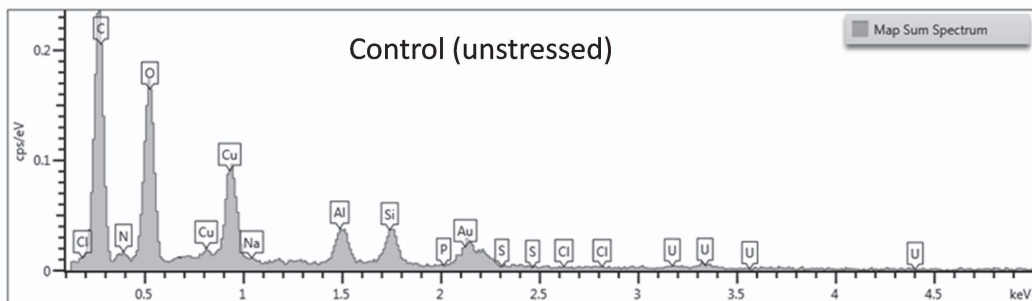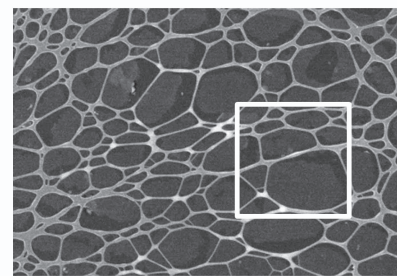

C, O, N (6/6)  
 S (2/6), K (3/6)  
 Trace amounts of Na,  
 Cl, P

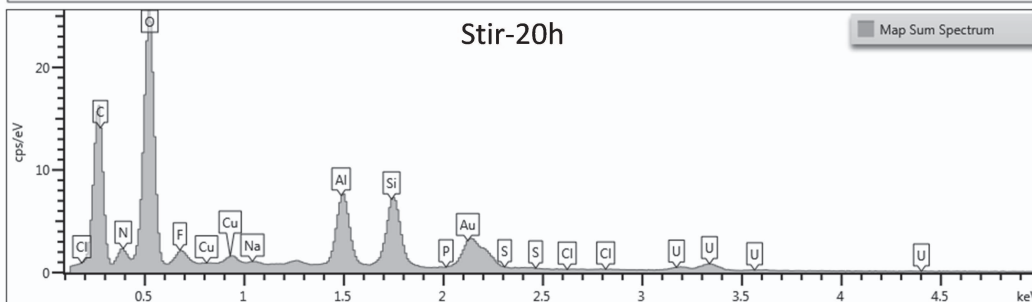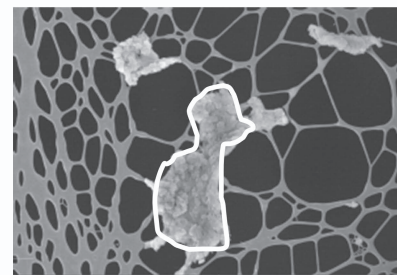

C, O, N, F (10/10)  
 S (8/10),  
 Trace amounts of Na,  
 Cl, P

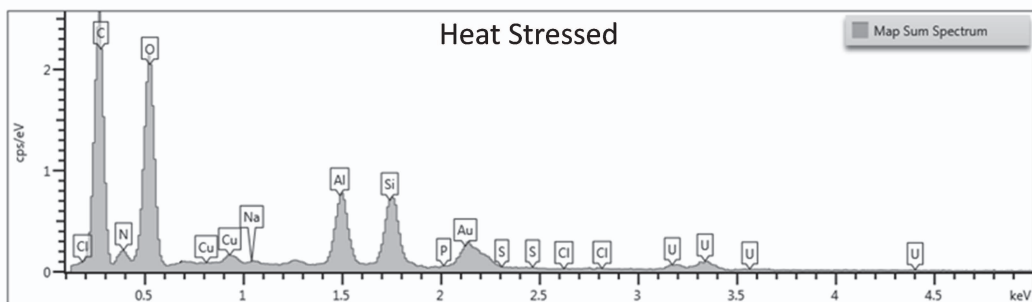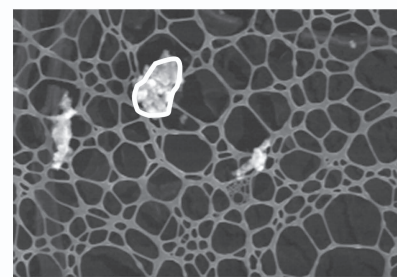

C, O, N (9/9)  
 S (1/9),  
 Trace amounts of Na,  
 Cl, P

5  $\mu$ m

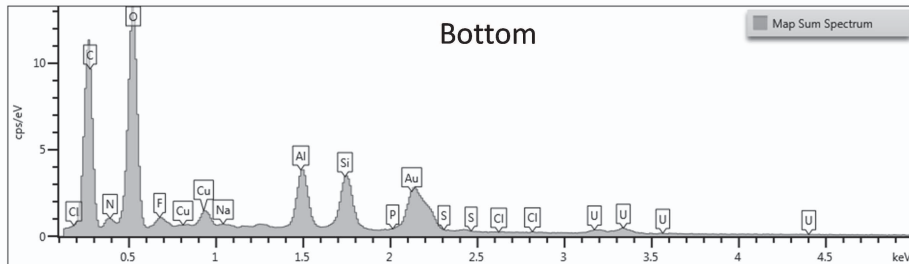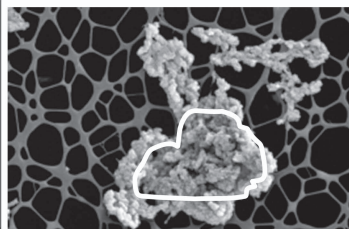

**Most Abundant Elements**

C, O, N, F (17/17)  
S (11/17),  
Trace amounts of Na,  
Cl, P

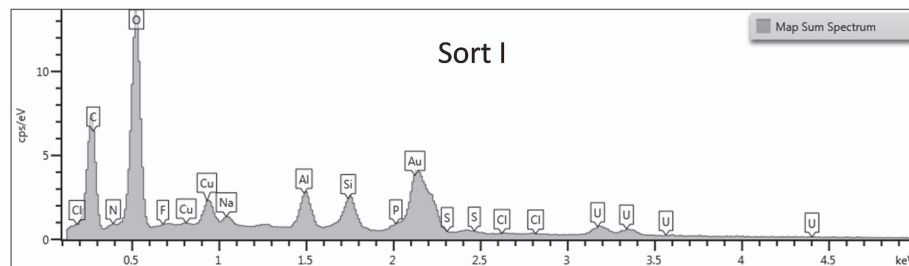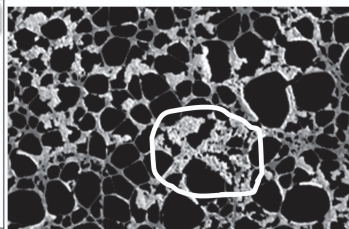

C, O, N, P (17/17)  
F (11/17), S (12/17),  
Na, Cl (10/17),

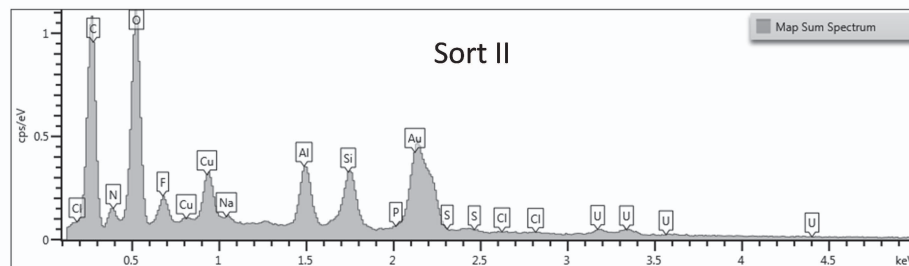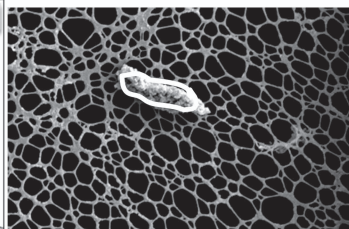

C, O, N, Na, F, P, Cl (11/11)  
S (3/11),

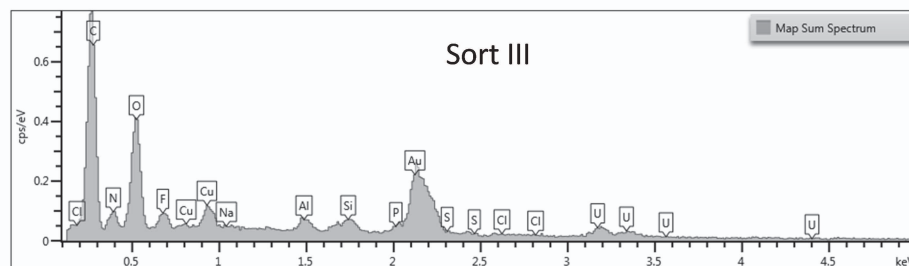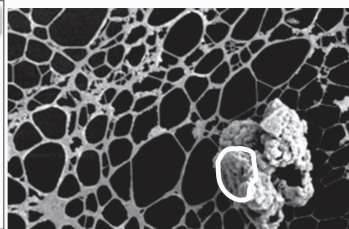

C, O, N, Na, F, P, Cl (13/13)  
S (4/13)

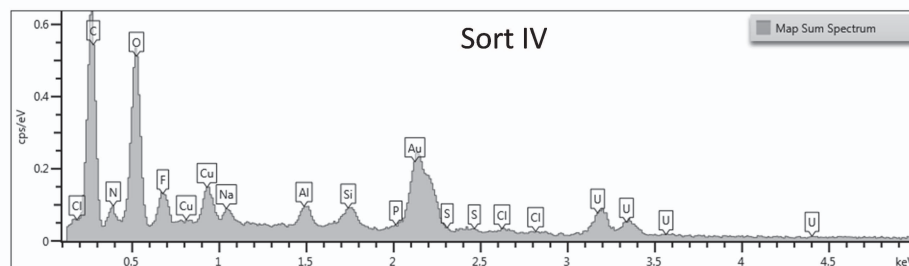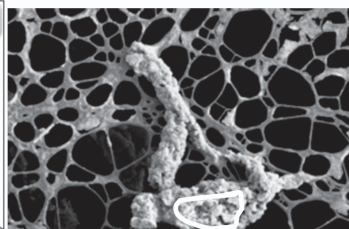

C, O, N, P (19/19)  
S (9/19), Na (13/19),  
Cl (18/19), F (17/19)

5  $\mu$ m
